# Supplementary material for: Adamantane Containing Peptidoglycan Fragments Enhance RANTES and IL-6 Production in Lipopolysaccharide-Induced Macrophages
Source: PubMed Central journal article supplement (PMC7465286; doi:10.3390/molecules25163707), 2020-08-14

## Supplementary Information

# Adamantane containing peptidoglycan fragments enhance RANTES and IL-6 production in lipopolysaccharide-induced macrophages

Mateja Manček-Keber <sup>1,8,†</sup>, Rosana Ribić <sup>2,†</sup>, Fernando Chain <sup>3</sup>, Davy Sinnaeve <sup>3,4,5</sup>, José C. Martins <sup>3</sup>, Roman Jerala <sup>1,8</sup>, Srđanka Tomić <sup>6</sup> and Krisztina Fehér <sup>7,8\*</sup>

<sup>1</sup> Department of Synthetic Biology and Immunology, National Institute of Chemistry, Hajdrihova 19, POBox 660, SI-1001 Ljubljana, Slovenia; mateja.mancek@ki.si (M. M.-K.), roman.jerala@ki.si (R. J.)

<sup>2</sup> University center Varaždin, University North, Jurja Križanića 31b, HR-42 000, Varaždin, Croatia; rosana.ribic@unin.hr (R.R.);

<sup>3</sup> Department of Organic and Macromolecular Chemistry, Ghent University, Krijgslaan 281 S4, 9000, Ghent, Belgium; fernando.chain@ugent.be (F. C.), Davy.Sinnaeve@ugent.be (D.S.), jose.martins@ugent.be (J. C. M.)

<sup>4</sup> Univ. Lille, Inserm, Institut Pasteur de Lille, CHU Lille, U1167 - Labex DISTALZ - RID-AGE - Risk Factors and Molecular Determinants of Aging-Related Diseases, F-59000 Lille, France

<sup>5</sup> CNRS, ERL9002 - Integrative Structural Biology, F-59000 Lille, France

<sup>6</sup> Department of Chemistry, Faculty of Science, University of Zagreb, Horvatovac 102A, HR-10 000, Zagreb, Croatia; stomic@chem.pmf.hr

<sup>6</sup> Heidelberg Institute for Theoretical Studies, Schloss-Wolfsbrunnenweg 35, 69118 Heidelberg, Germany; feher.krisztina@h-its.org

<sup>7</sup> Molecular Recognition and Interaction Research Group, Hungarian Academy of Sciences, University of Debrecen, Egyetem tér 1, H-4032 Debrecen, Hungary

<sup>8</sup> Centre of Excellence EN-FIST, SI-1000 Ljubljana, Slovenia

\* Correspondence: feher.krisztina@science.unideb.hu, feher.krisztina@h-its.org Tel.: +36 52 512900 Fax: +36 52 518 660

**Figure S1** Size distribution of the liposome preparation made from L-alpha-phosphatidylcholine (PC) after sonication.

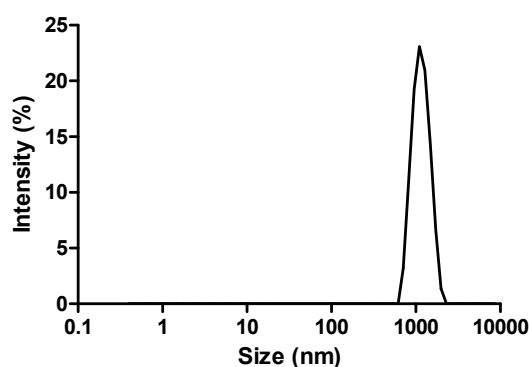

Supplement: molecules-25-03707-s001.pdf [file molecules-25-03707-s001.pdf]
